# Supplementary material
Source: PubMed Central journal article supplement (PMC5215000)
Supplement: NIHMS837726-supplement-Supporting_Information.pdf [file NIHMS837726-supplement-Supporting_Information.pdf]

## Supporting Information

### Pitiamides A and B, Multifunctional Fatty Acid Amides from Marine Cyanobacteria

Weijing Cai<sup>1,2</sup>, James H. Matthews<sup>1,2</sup>, Valerie J. Paul<sup>3</sup>, Hendrik Luesch<sup>1,2</sup>

#### Affiliations

<sup>1</sup>Department of Medicinal Chemistry, University of Florida, Gainesville, Florida, USA

<sup>2</sup>Center for Natural Products, Drug Discovery and Development (CNP3), University of Florida, Gainesville, Florida, USA

<sup>3</sup>Smithsonian Marine Station, Fort Pierce, Florida, USA

#### Correspondence

*Prof. Dr. Hendrik Luesch*

Department of Medicinal Chemistry

University of Florida

1345 Center Drive

Gainesville, Florida 32610

USA

Phone: +1 (352) 273-7738

Fax: +1 (352) 273-7741

[luesch@cop.ufl.edu](mailto:luesch@cop.ufl.edu)

## Content

**Fig. S1**  $^1\text{H}$  NMR spectrum of 1*E*-pitiamide B (**1**) in  $\text{CDCl}_3$  (600 MHz).

**Fig. S2** COSY NMR spectrum of 1*E*-pitiamide B (**1**) in  $\text{CDCl}_3$  (600 MHz).

**Fig. S3** TOCSY NMR spectrum of 1*E*-pitiamide B (**1**) in  $\text{CDCl}_3$  (600 MHz).

**Fig. S4** HSQC NMR spectrum of 1*E*-pitiamide B (**1**) in  $\text{CDCl}_3$  (600 MHz).

**Fig. S5** HMBC NMR spectrum of 1*E*-pitiamide B (**1**) in  $\text{CDCl}_3$  (600 MHz).

**Fig. S6**  $^1\text{H}$  NMR spectrum of 1*Z*-pitiamide B (**2**) in  $\text{CDCl}_3$  (600 MHz).

**Fig. S7** COSY NMR spectrum of 1*Z*-pitiamide B (**2**) in  $\text{CDCl}_3$  (600 MHz).

**Fig. S8** TOCSY NMR spectrum of 1*Z*-pitiamide B (**2**) in  $\text{CDCl}_3$  (600 MHz).

**Fig. S9** HSQC NMR spectrum of 1*Z*-pitiamide B (**2**) in  $\text{CDCl}_3$  (600 MHz).

**Fig. S10** HMBC NMR spectrum of 1*Z*-pitiamide B (**2**) in  $\text{CDCl}_3$  (600 MHz).

**Fig. S11**  $^1\text{H}$  NMR spectrum of pitiamide A in  $\text{CDCl}_3$  (600 MHz).

**Fig. S12** COSY NMR spectrum of pitiamide A in  $\text{CDCl}_3$  (600 MHz).

**Fig. S13** TOCSY NMR spectrum of pitiamide A in  $\text{CDCl}_3$  (600 MHz).

**Fig. S14** HSQC NMR spectrum of pitiamide A in  $\text{CDCl}_3$  (600 MHz).

**Fig. S15** HMBC NMR spectrum of pitiamide A in  $\text{CDCl}_3$  (600 MHz).

**Table S1** Reported optical activity of model compounds with  $\alpha$ -ketone stereocenter and similar structure scaffold.

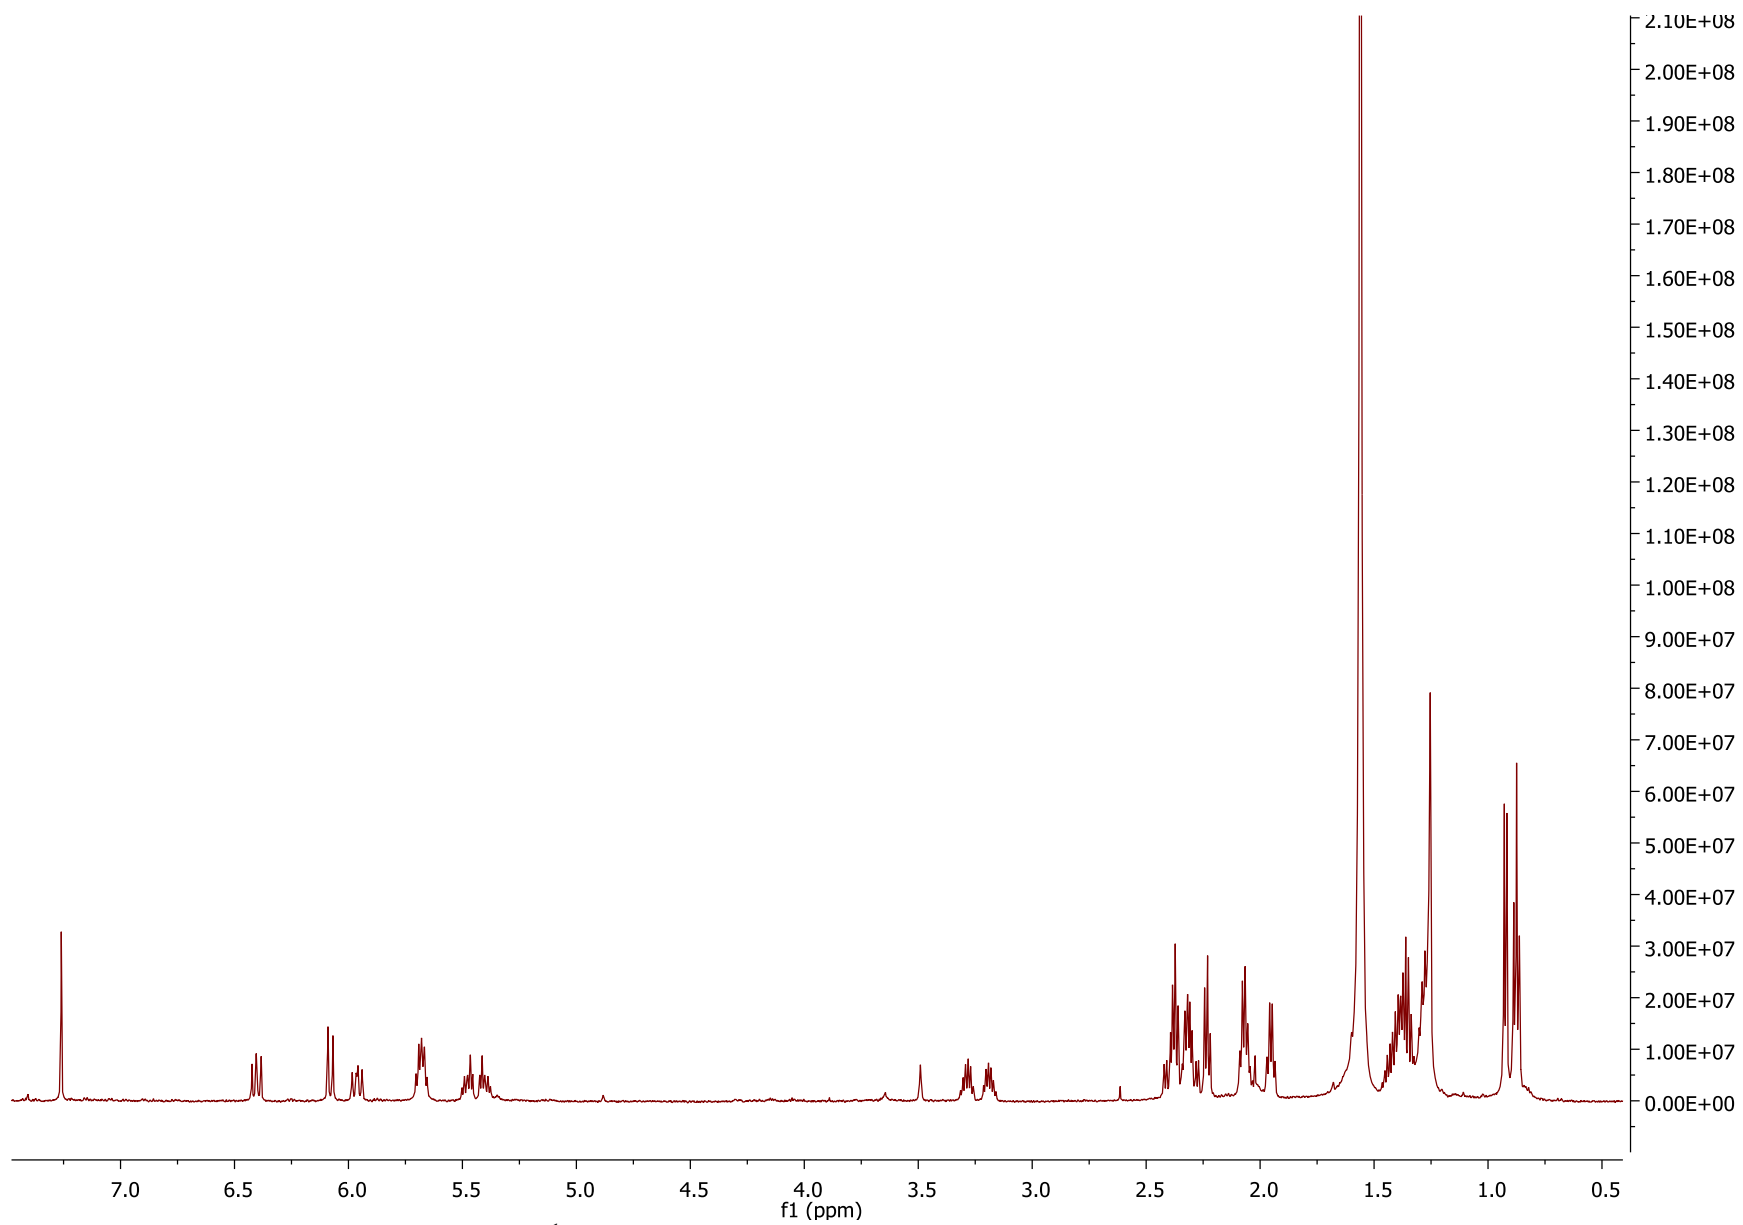

**Fig. S1** <sup>1</sup>H NMR spectrum of 1*E*-pitamide B (**1**) in CDCl<sub>3</sub> (600 MHz).

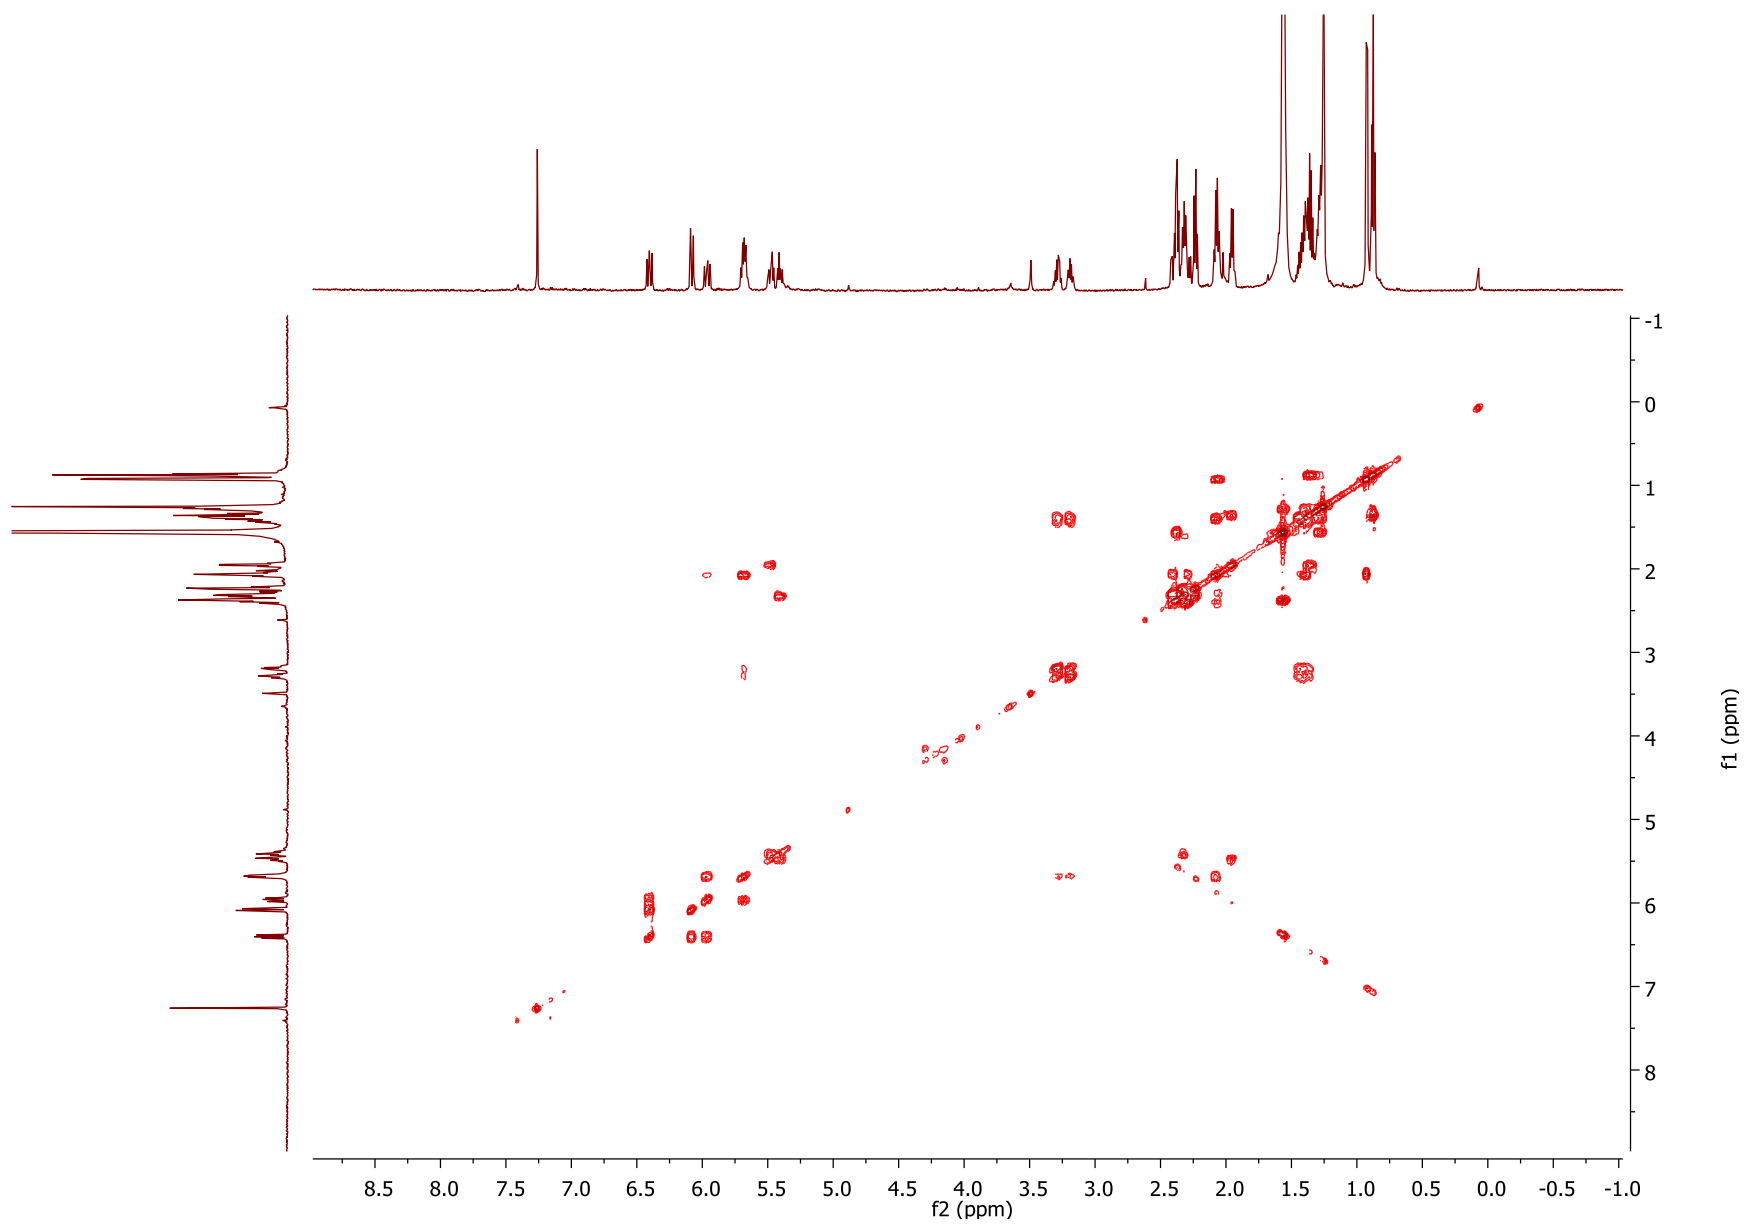

**Fig. S2** COSY spectrum of 1*E*-pitiamide B (**1**) in CDCl<sub>3</sub> (600 MHz).

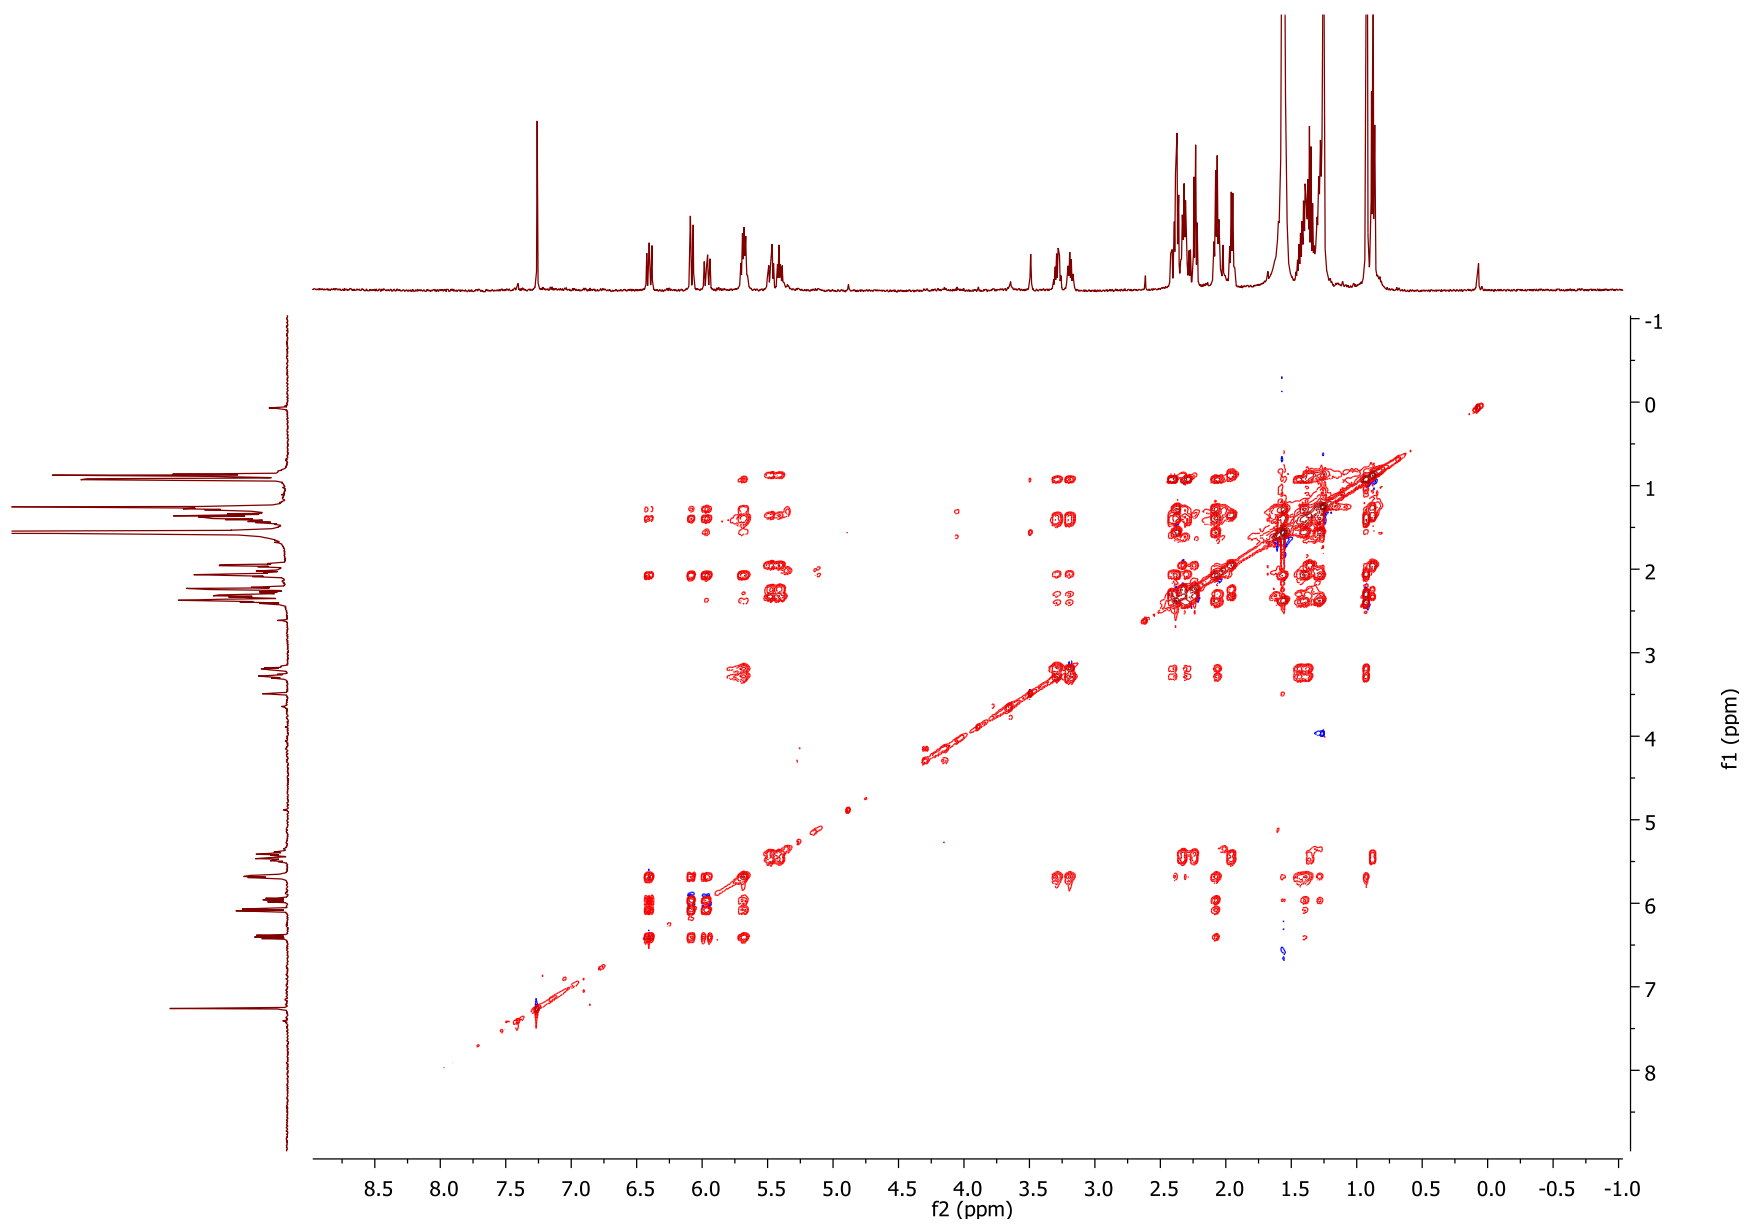

**Fig. S3** TOCSY spectrum of 1*E*-pitamide B (**1**) in CDCl<sub>3</sub> (600 MHz).

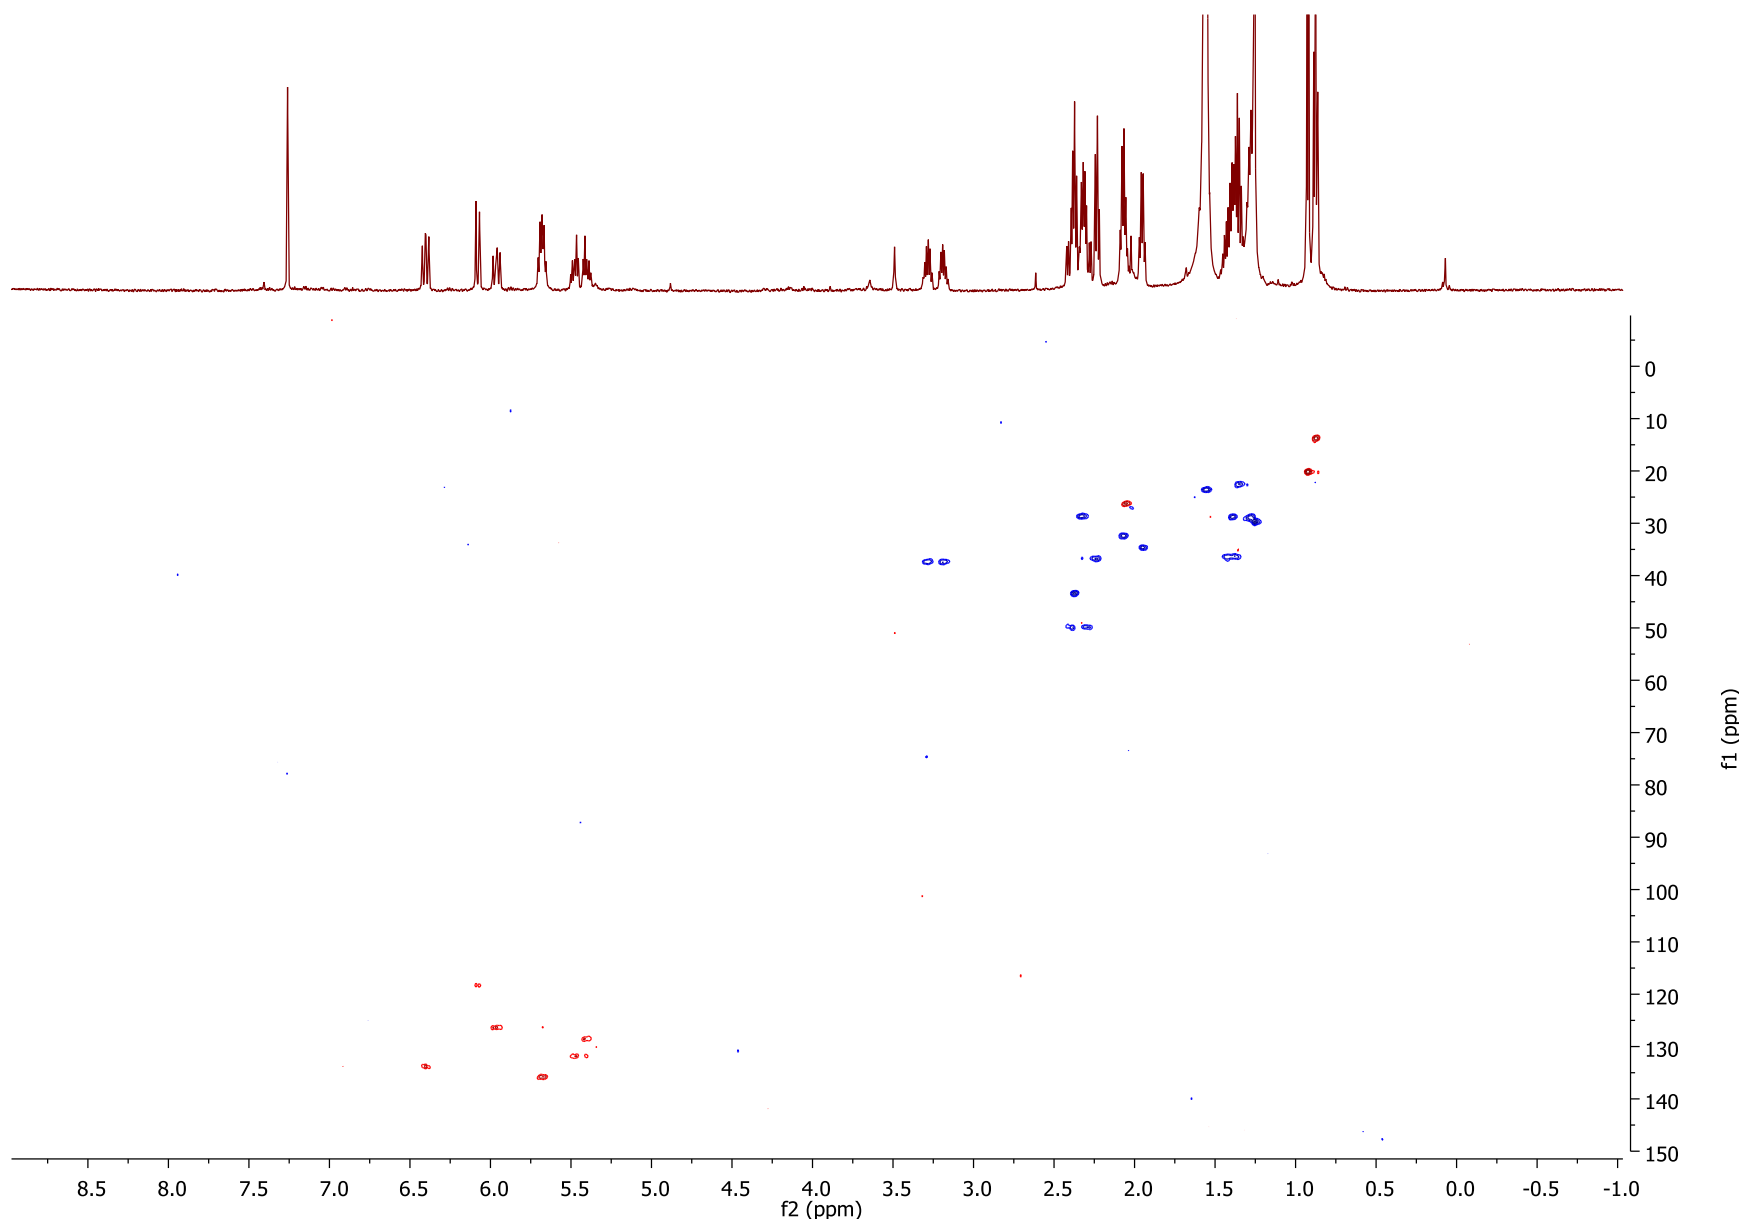

**Fig. S4** HSQC spectrum of 1*E*-pitiamide B (**1**) in  $\text{CDCl}_3$  (600 MHz).

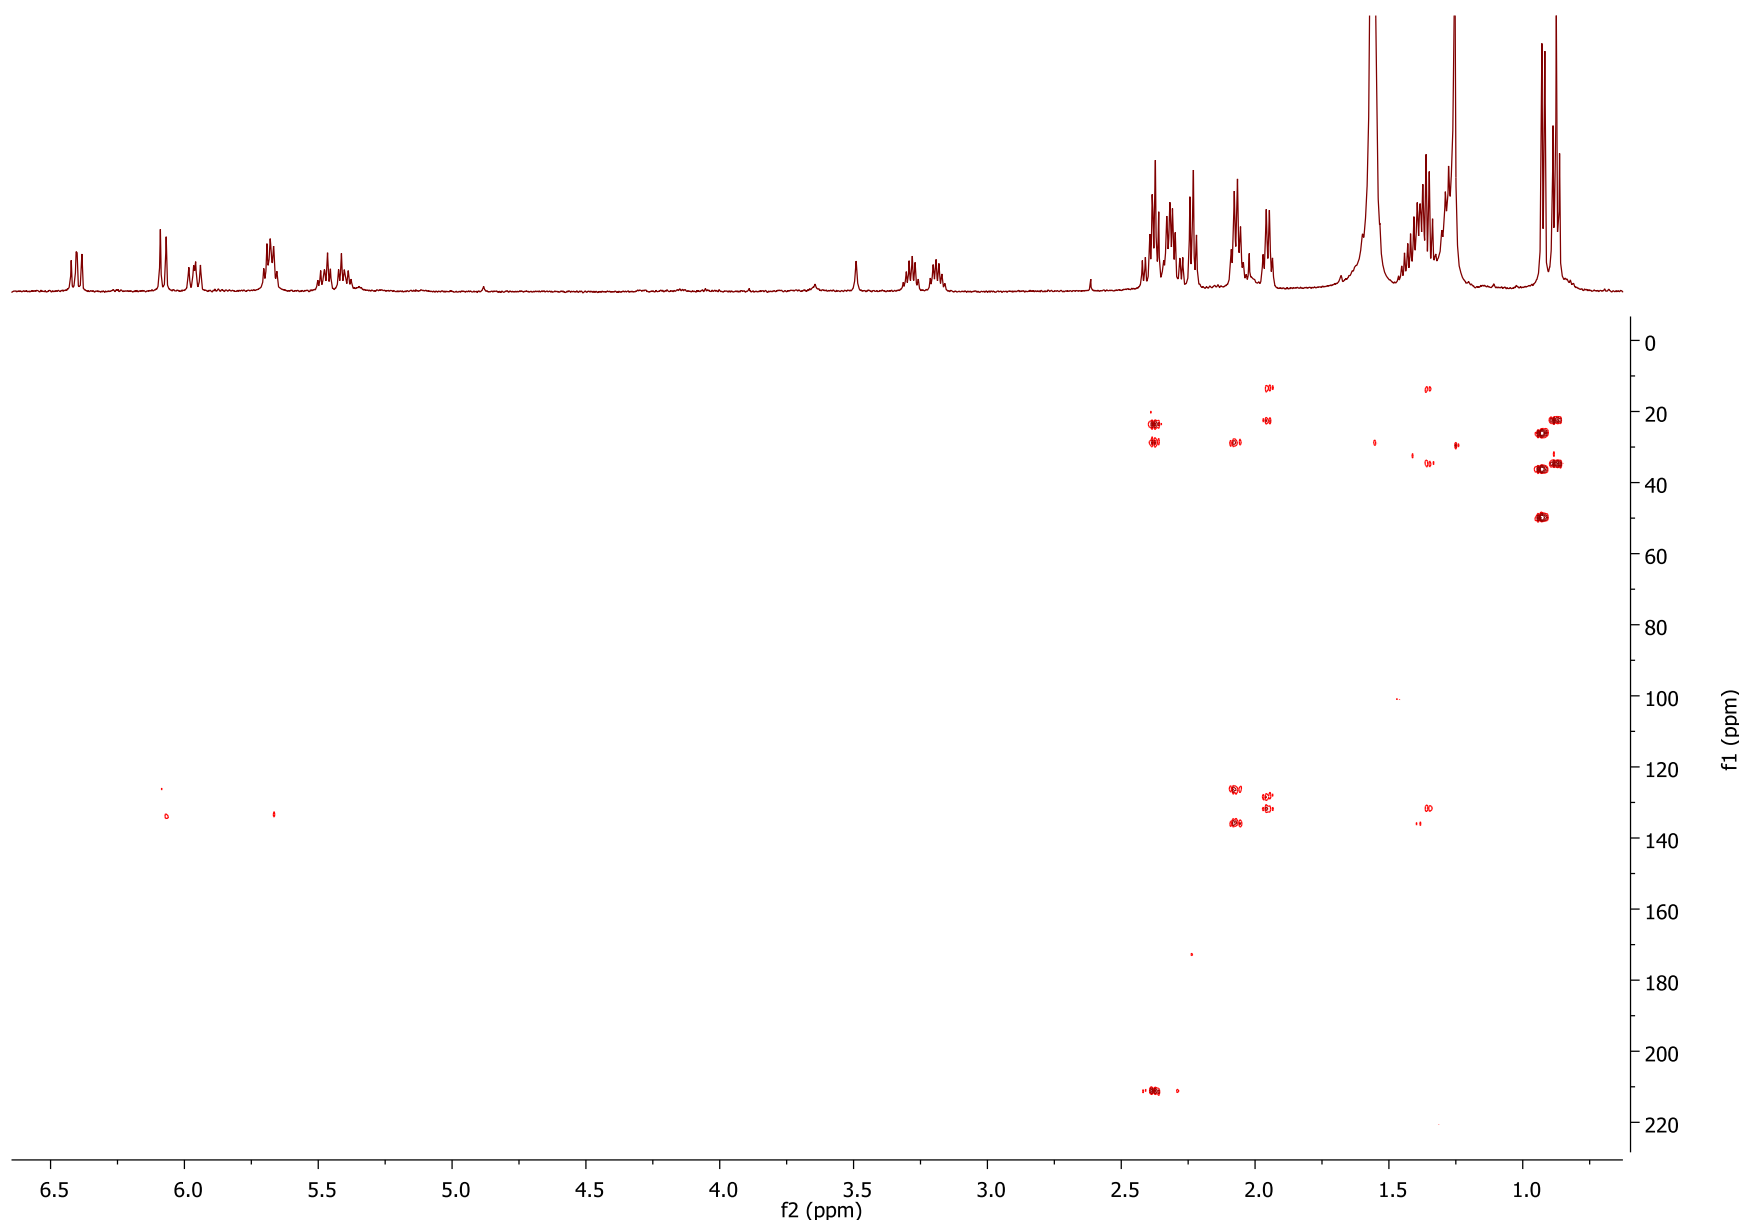

**Fig. S5** HMBC spectrum of 1*E*-pitiamide B (**1**) in CDCl<sub>3</sub> (600 MHz).

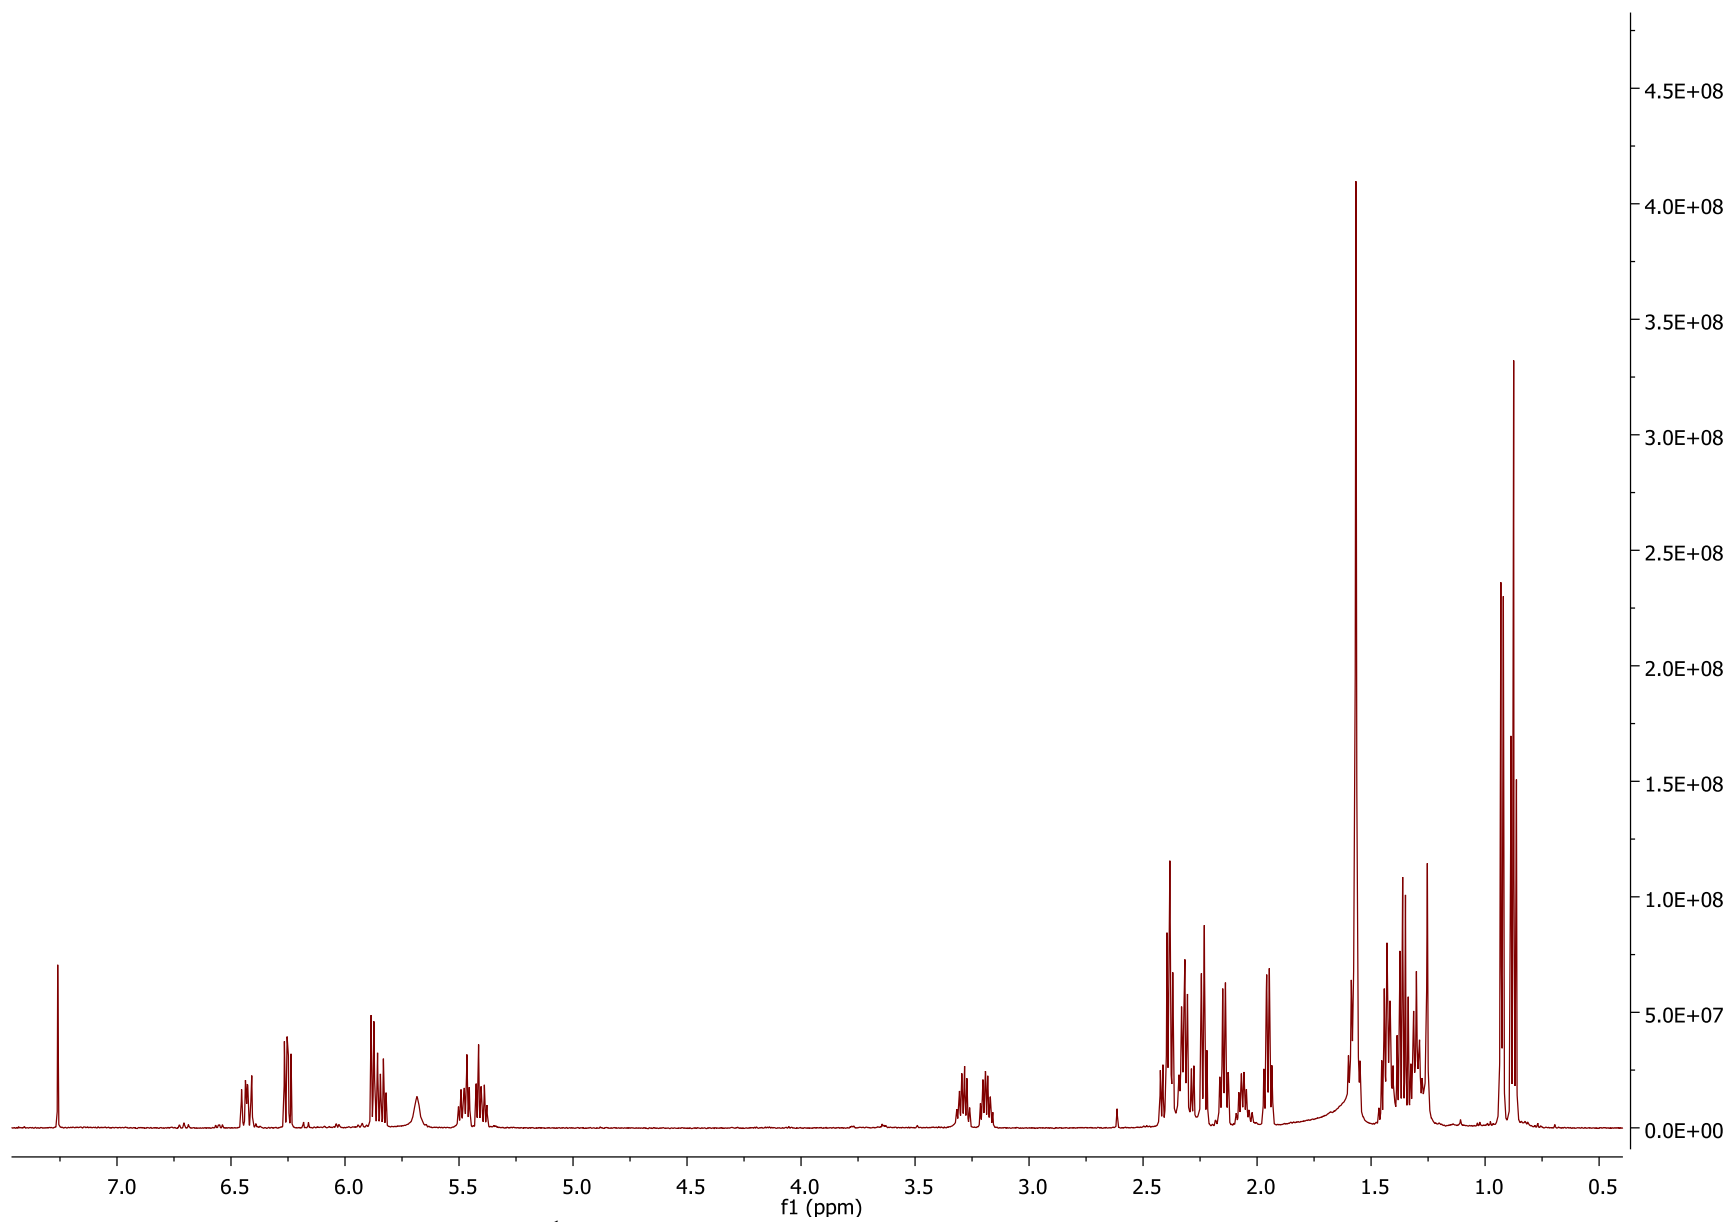

**Fig. S6**  $^1\text{H}$  NMR spectrum of 1Z-pitamide B (2) in  $\text{CDCl}_3$  (600 MHz).



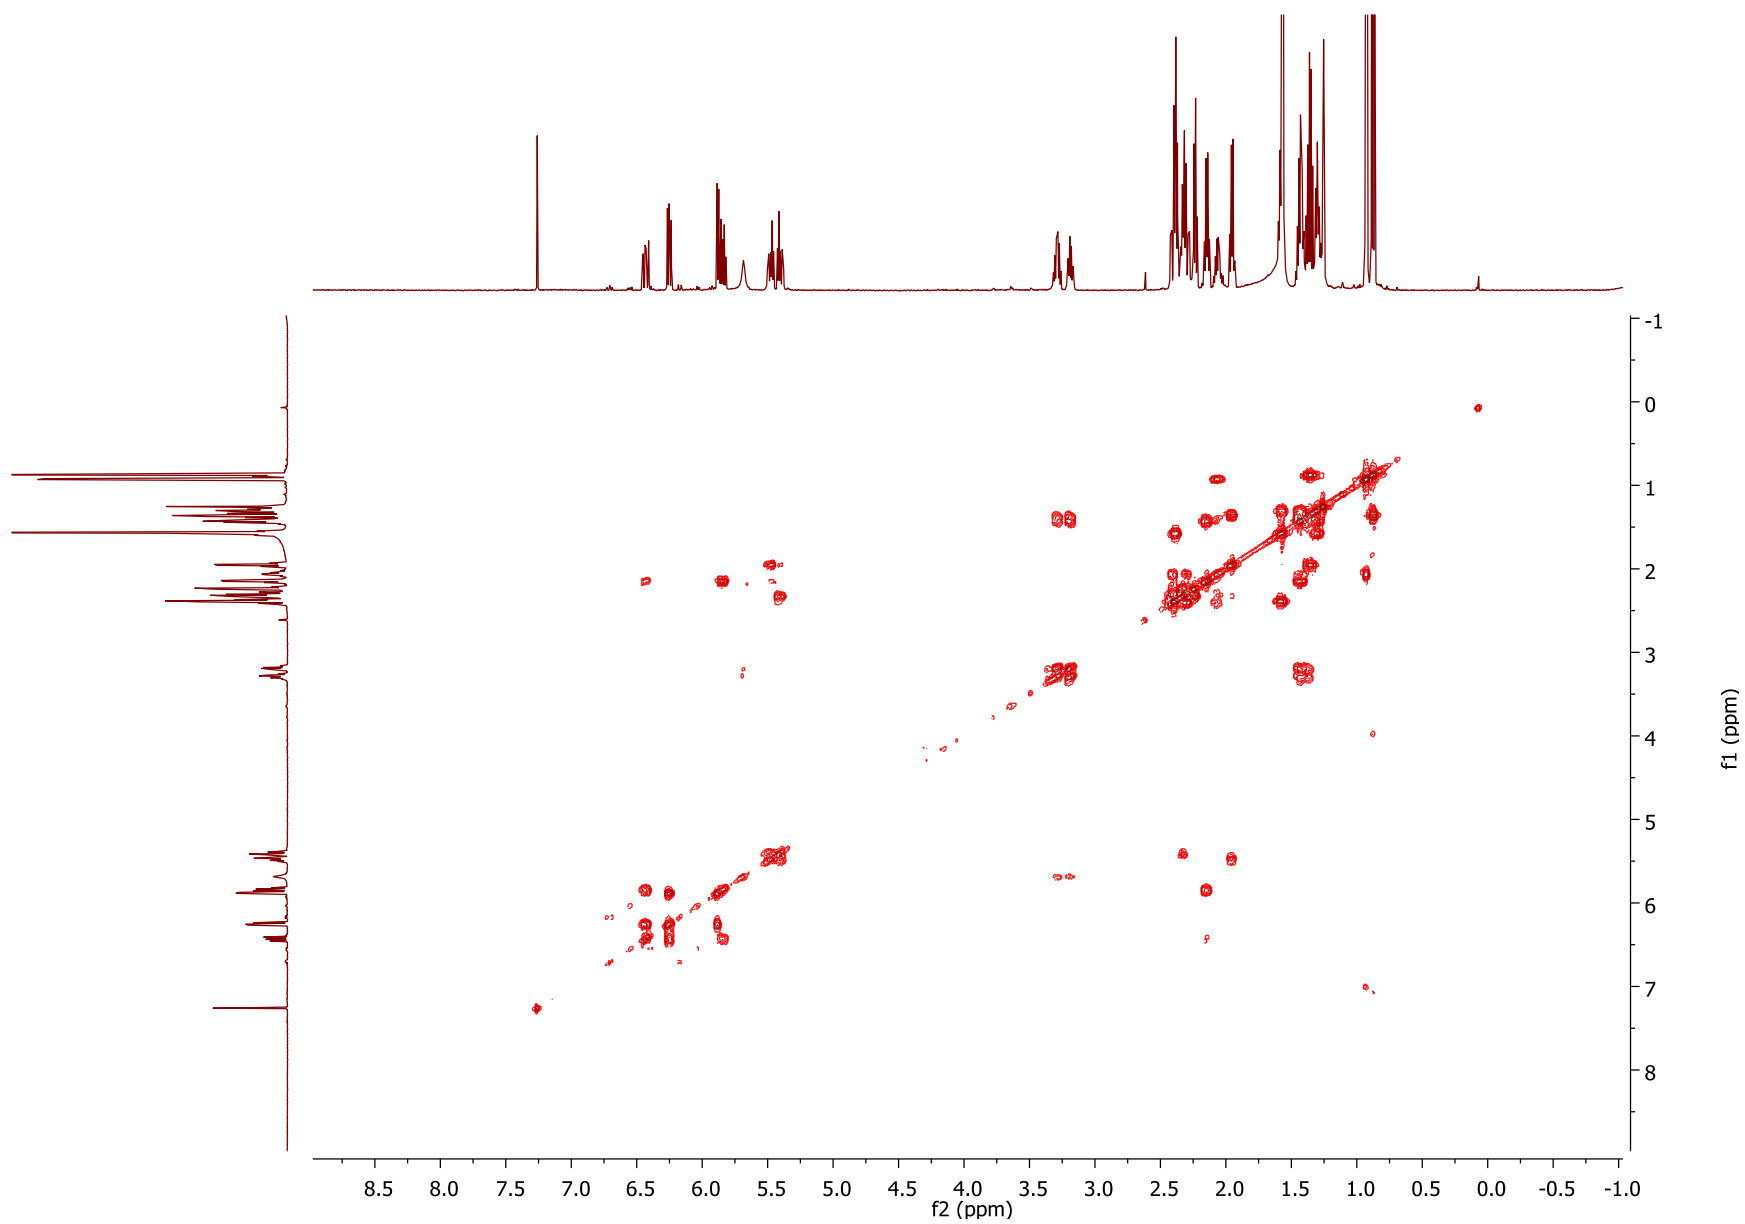

**Fig. S7** COSY spectrum of 1Z-pitamide B (**2**) in CDCl<sub>3</sub> (600 MHz).

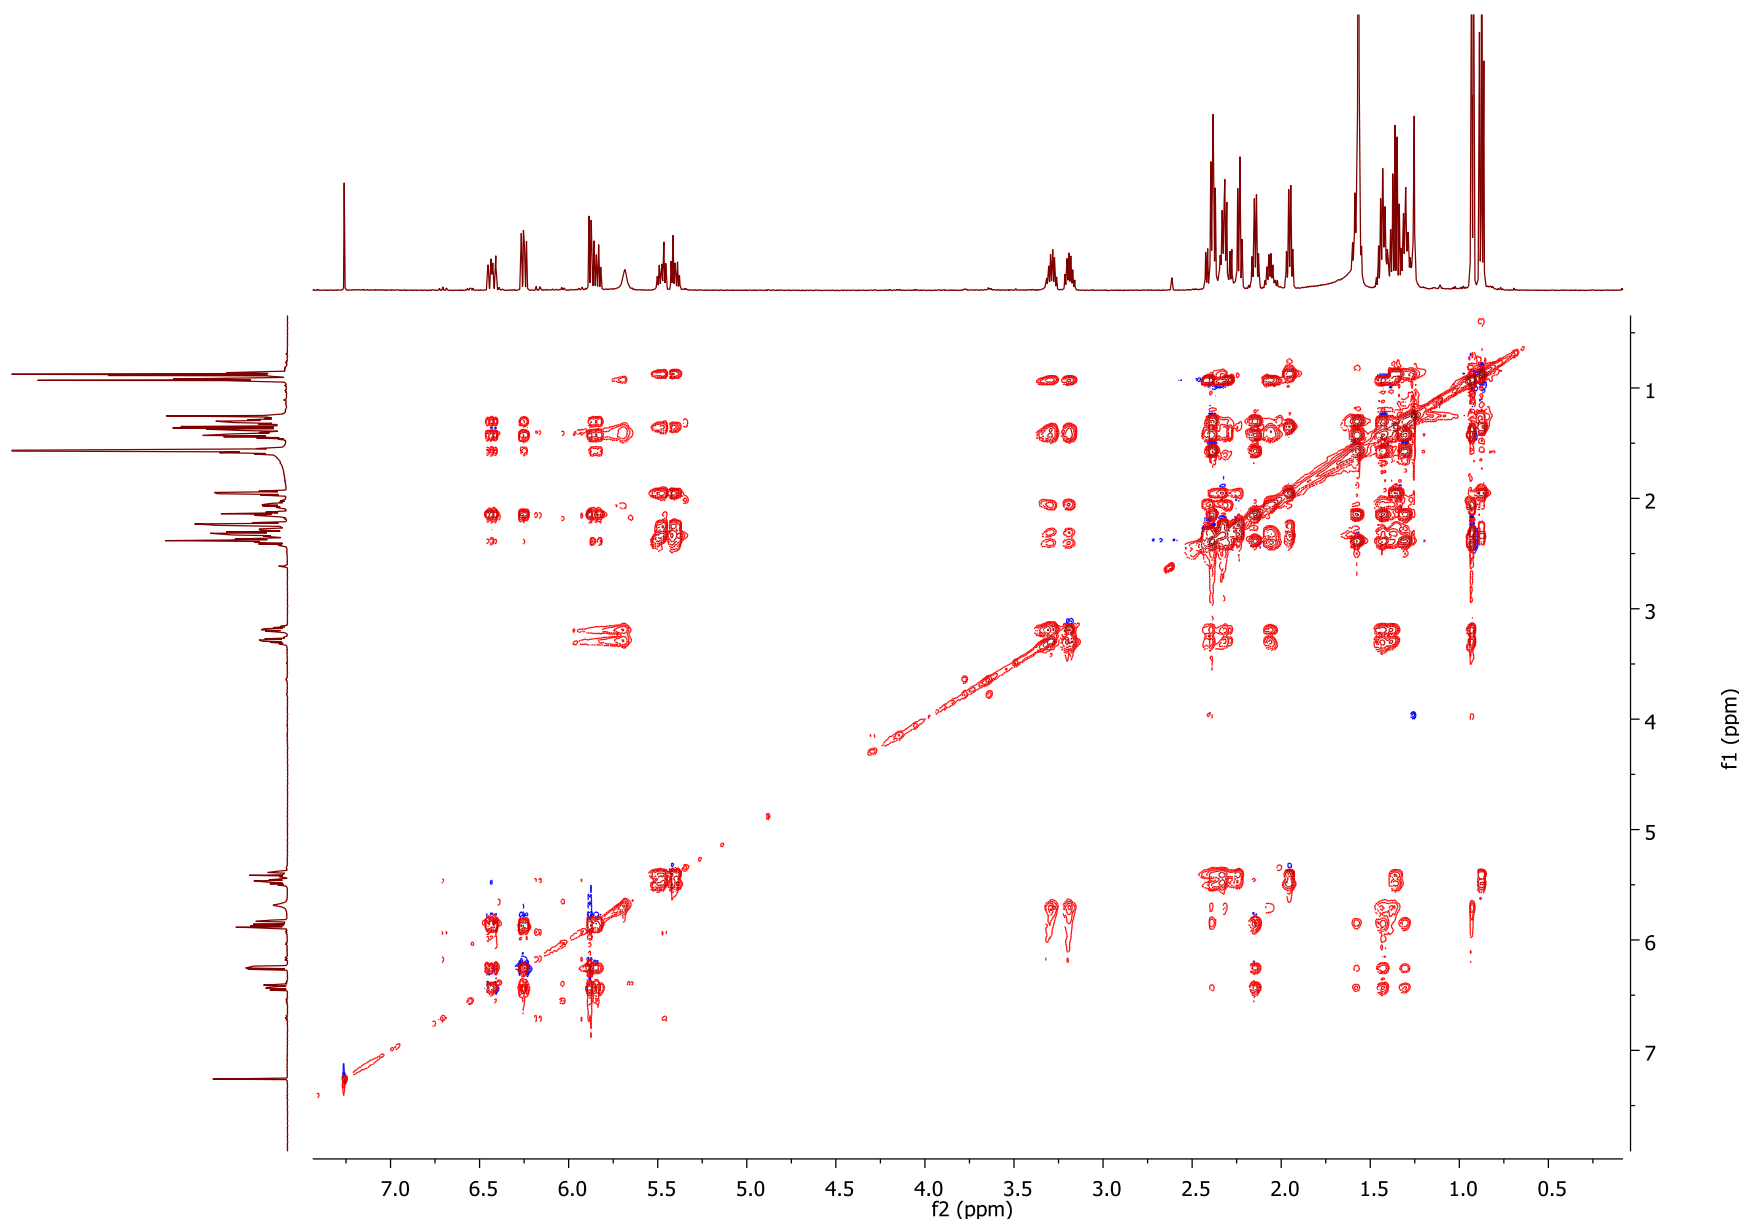

**Fig. S8** TOCSY spectrum of 1Z-pitamide B (**2**) in CDCl<sub>3</sub> (600 MHz).

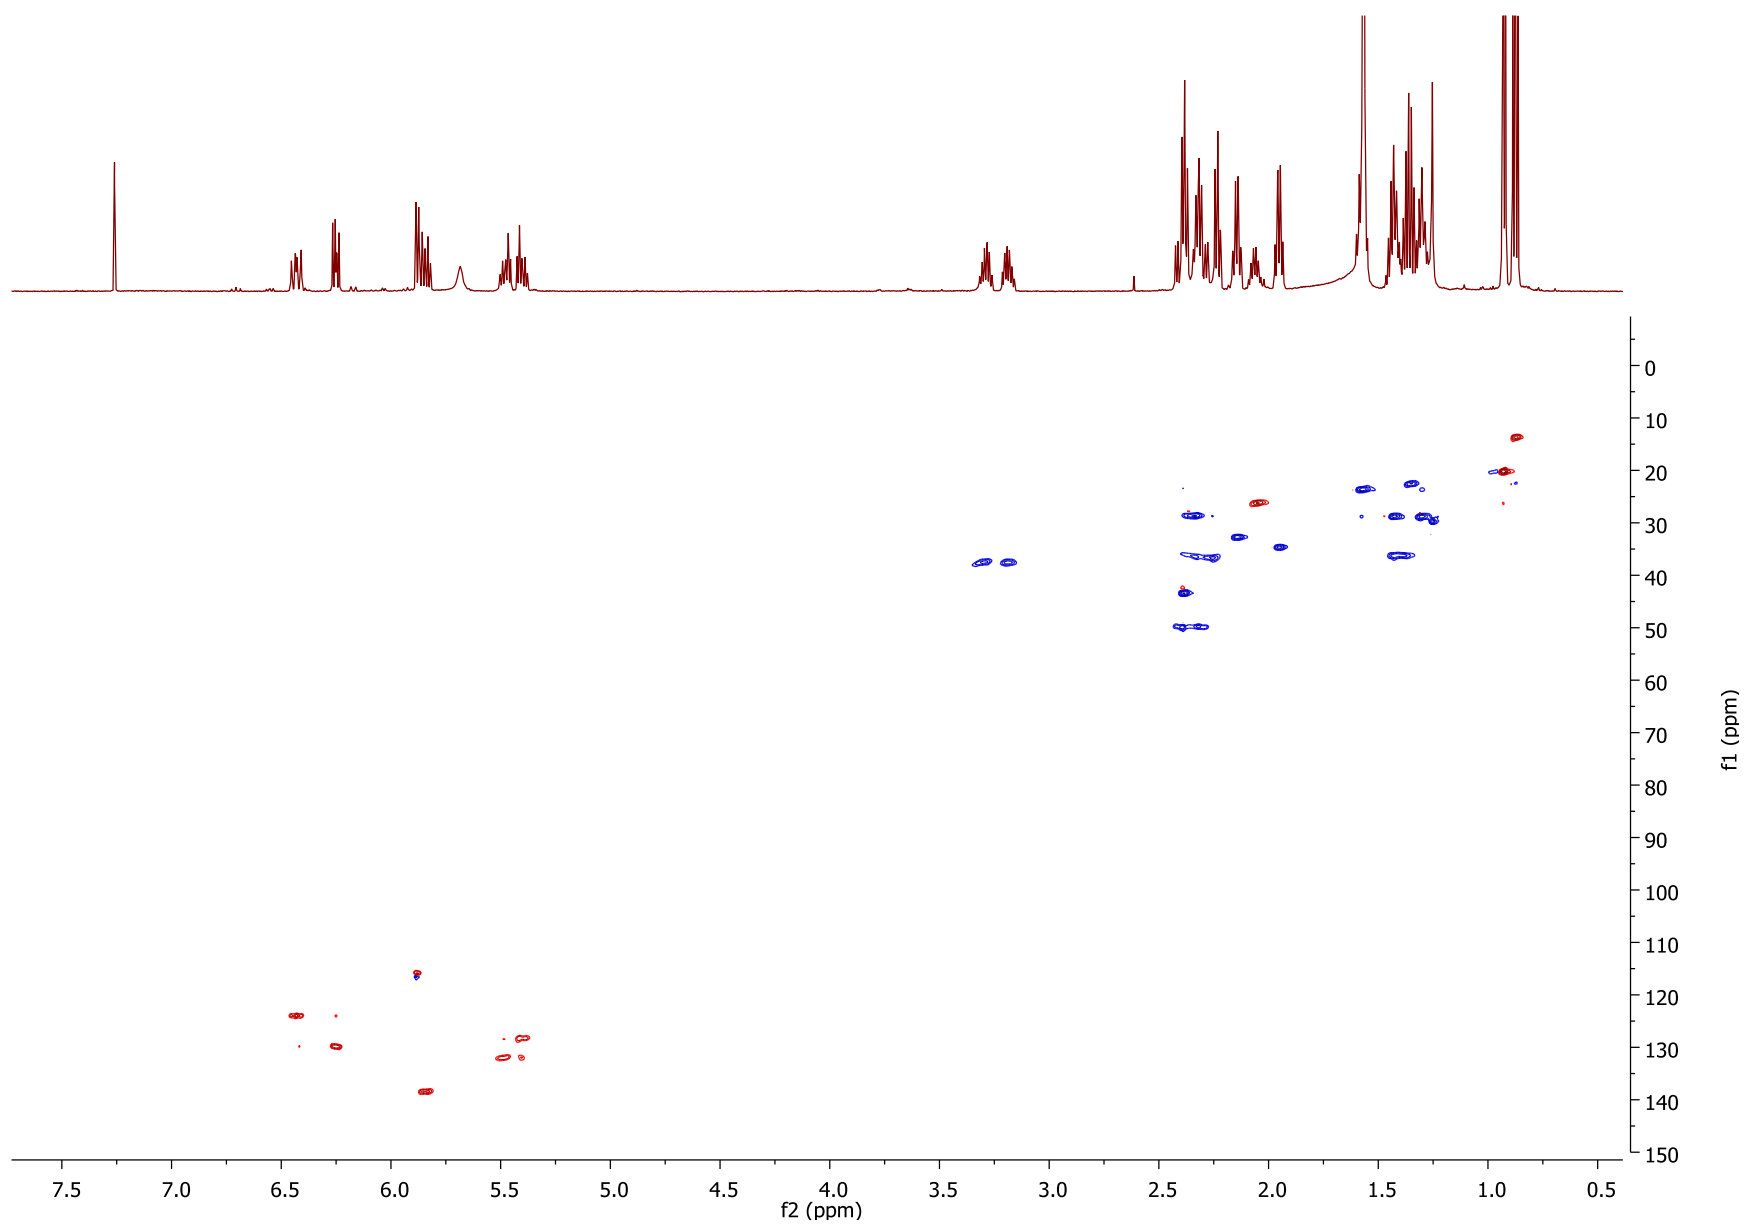

**Fig. S9** HSQC spectrum of 1Z-pitiamide B (**2**) in CDCl<sub>3</sub> (600 MHz).

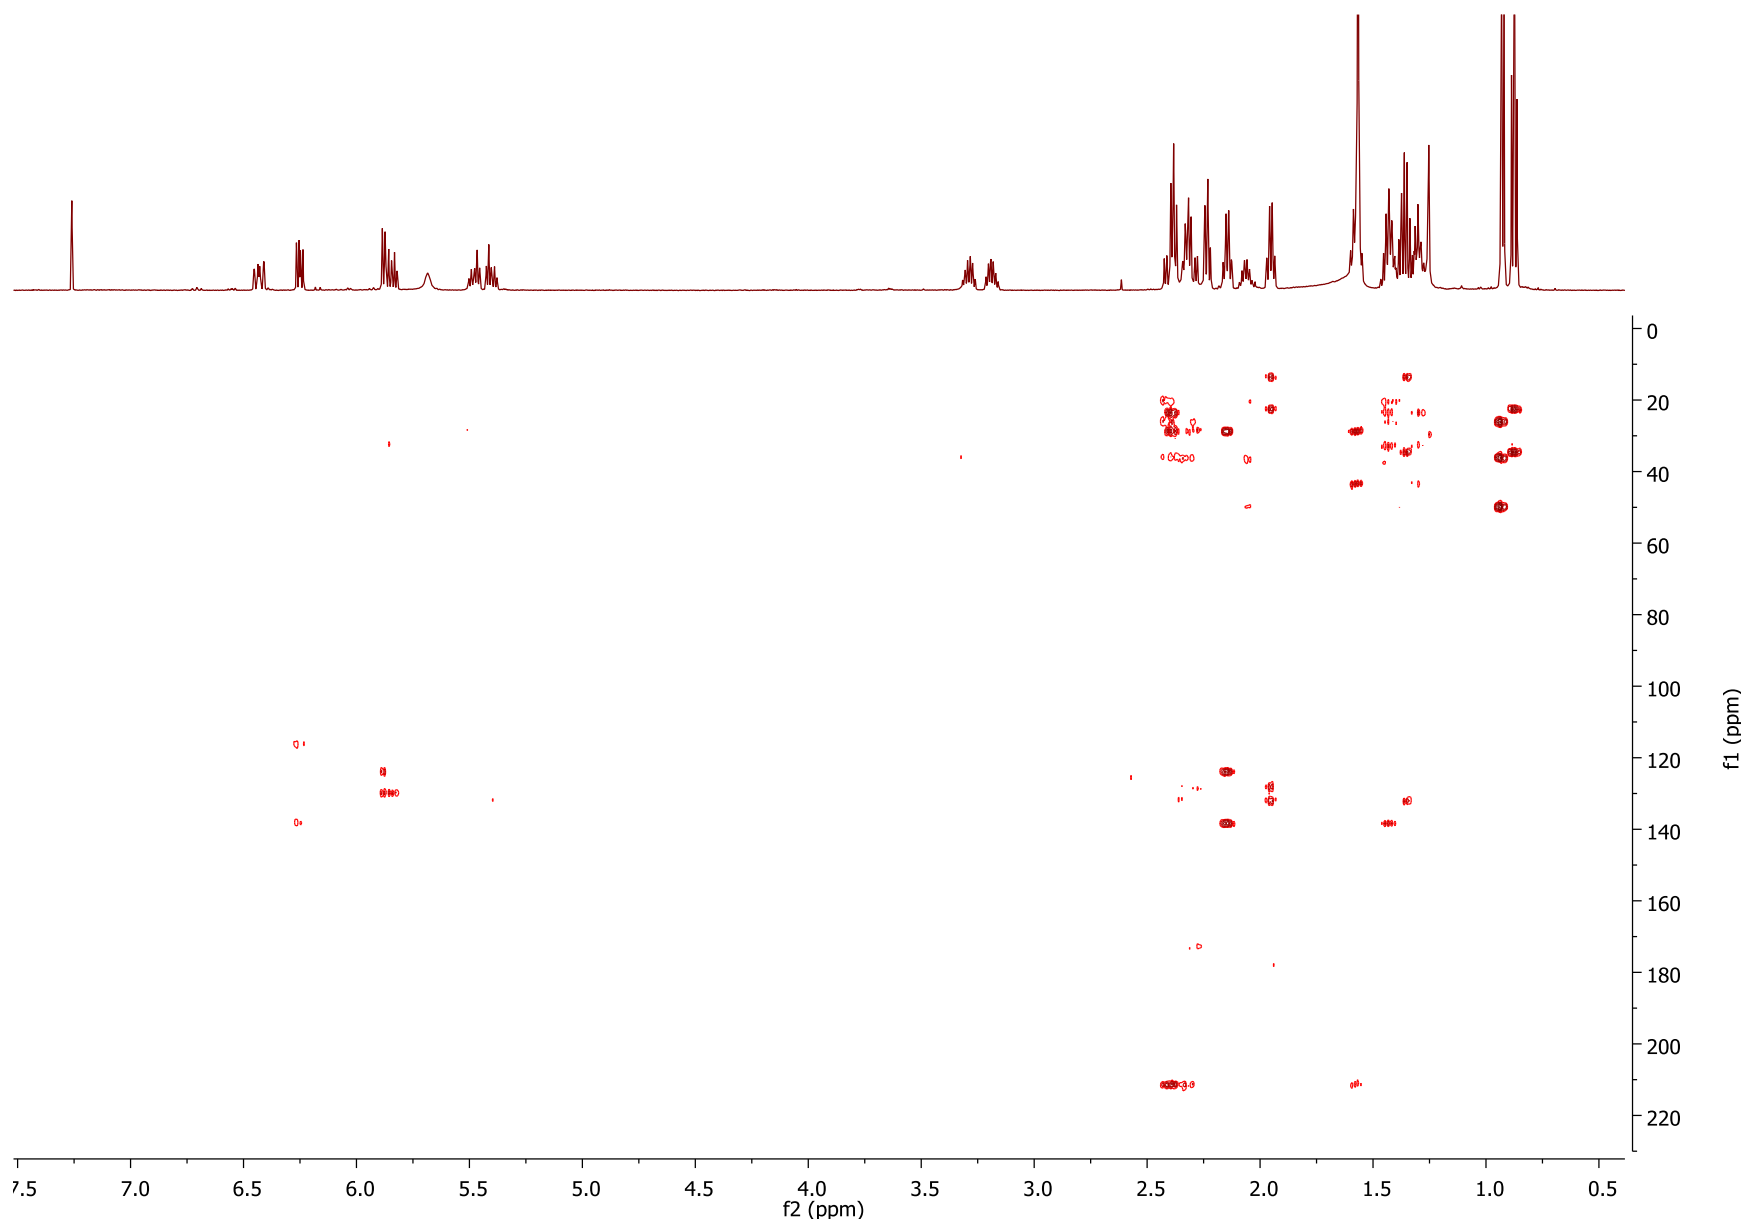

**Fig. S10** HMBC spectrum of 1Z-pitamide B (**2**) in CDCl<sub>3</sub> (600 MHz).

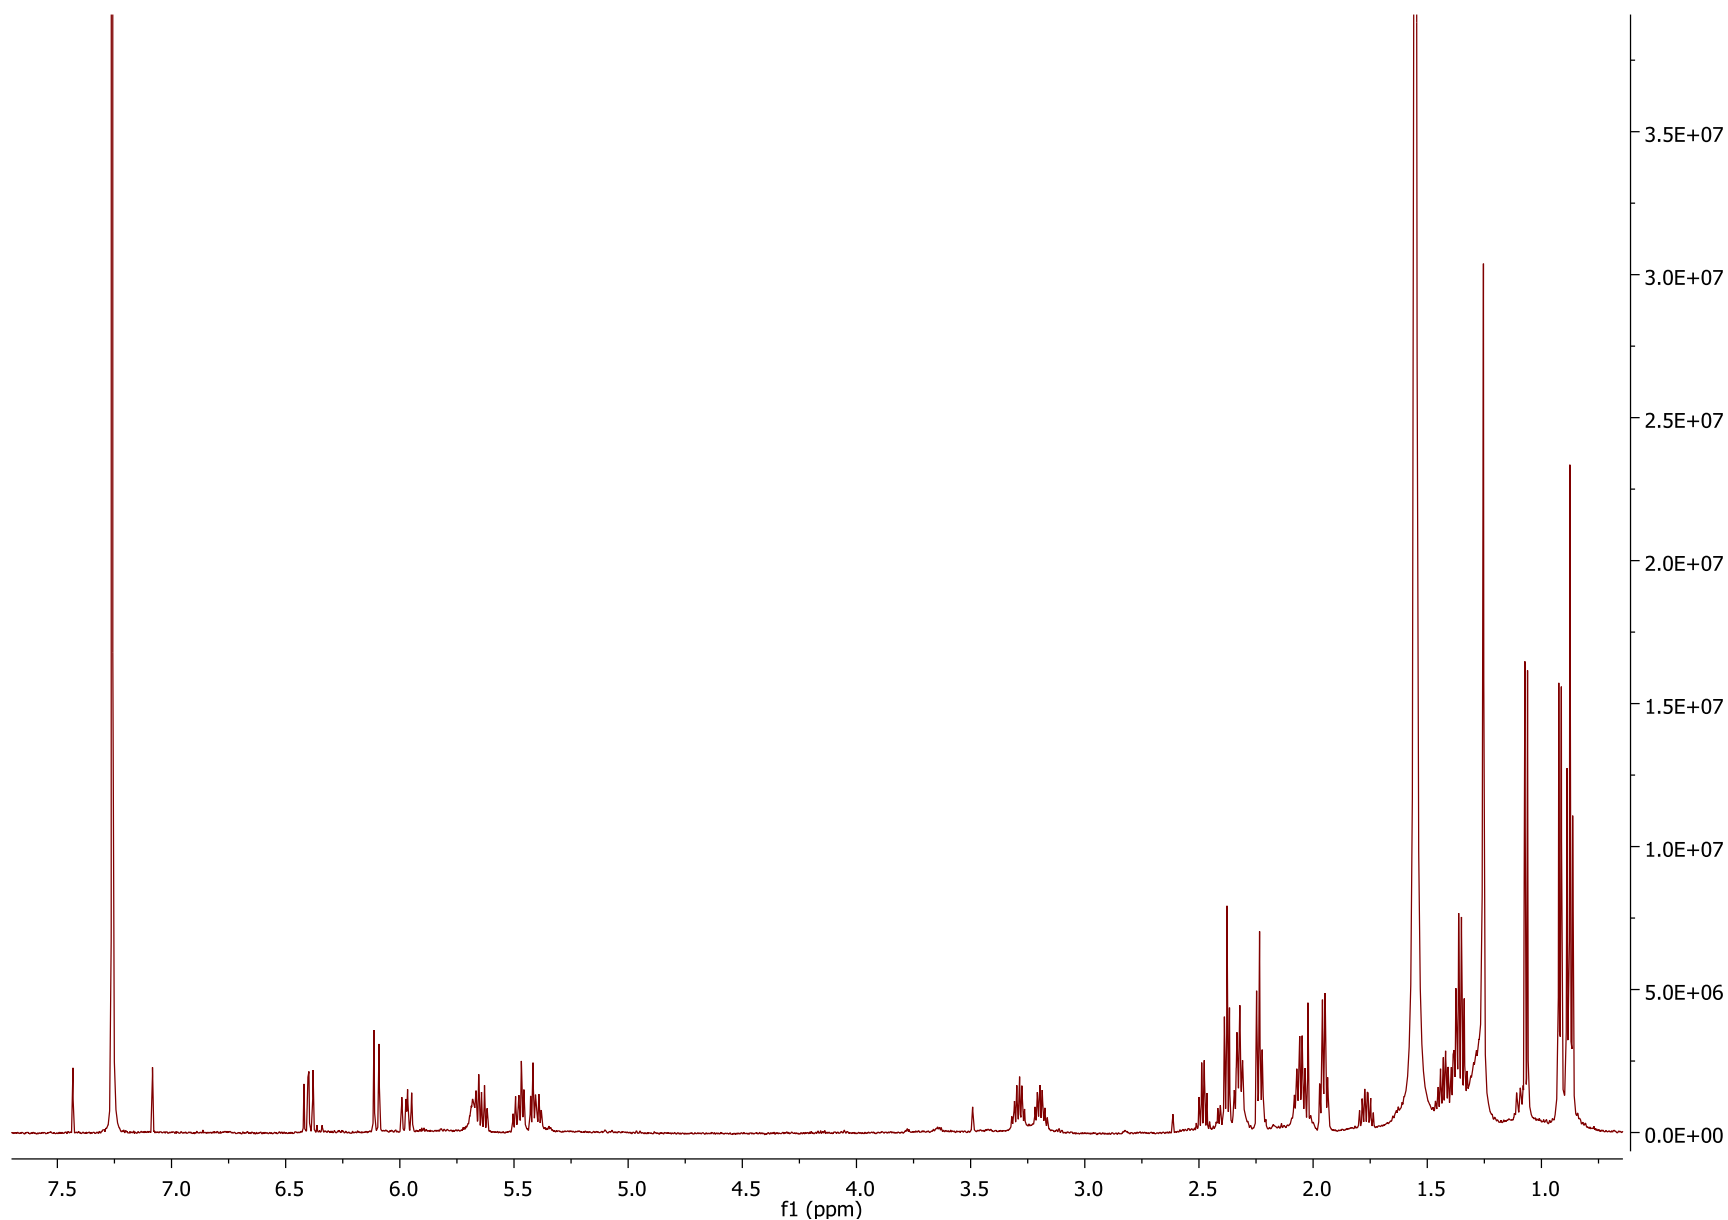

**Fig. S11**  $^1\text{H}$  NMR spectrum of pitiamide A in  $\text{CDCl}_3$  (600 MHz).

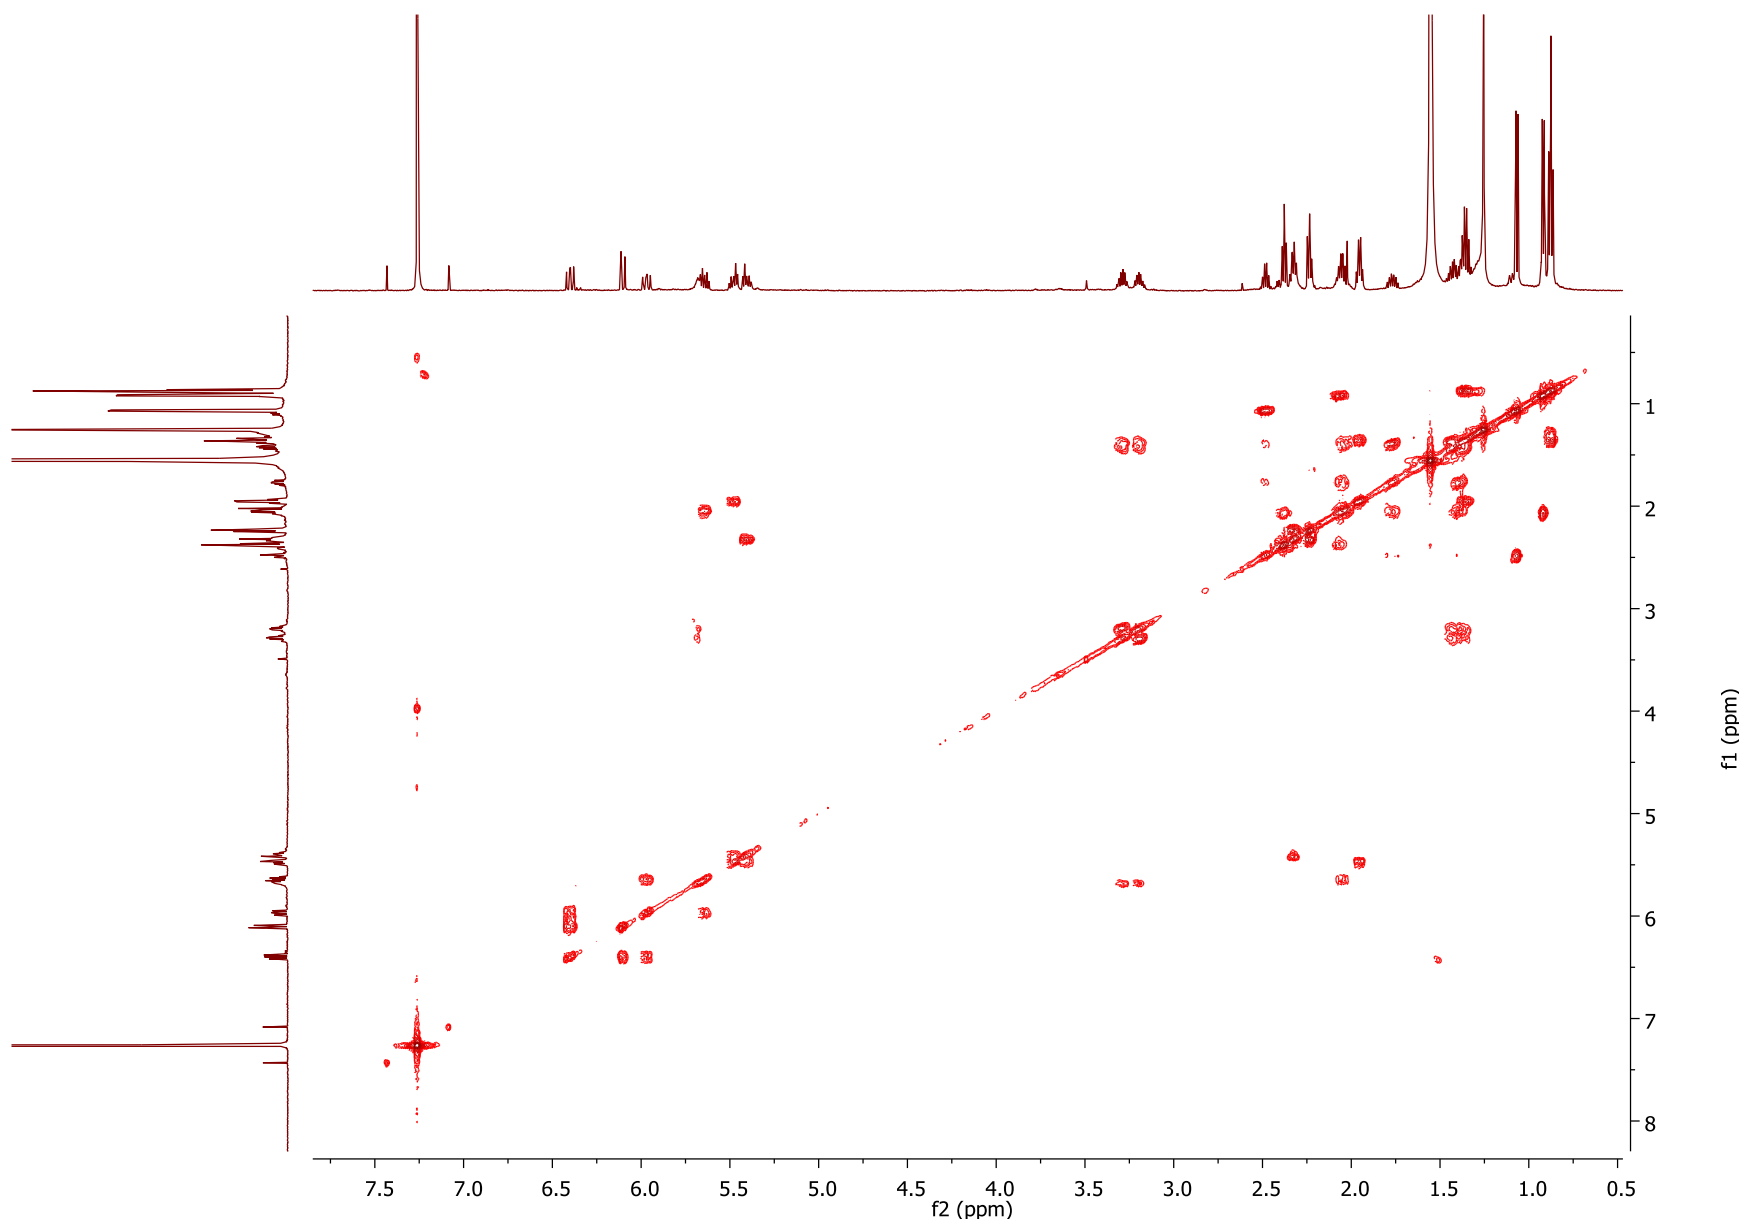

**Fig. S12** COSY spectrum of pitiamide A in CDCl<sub>3</sub> (600 MHz).

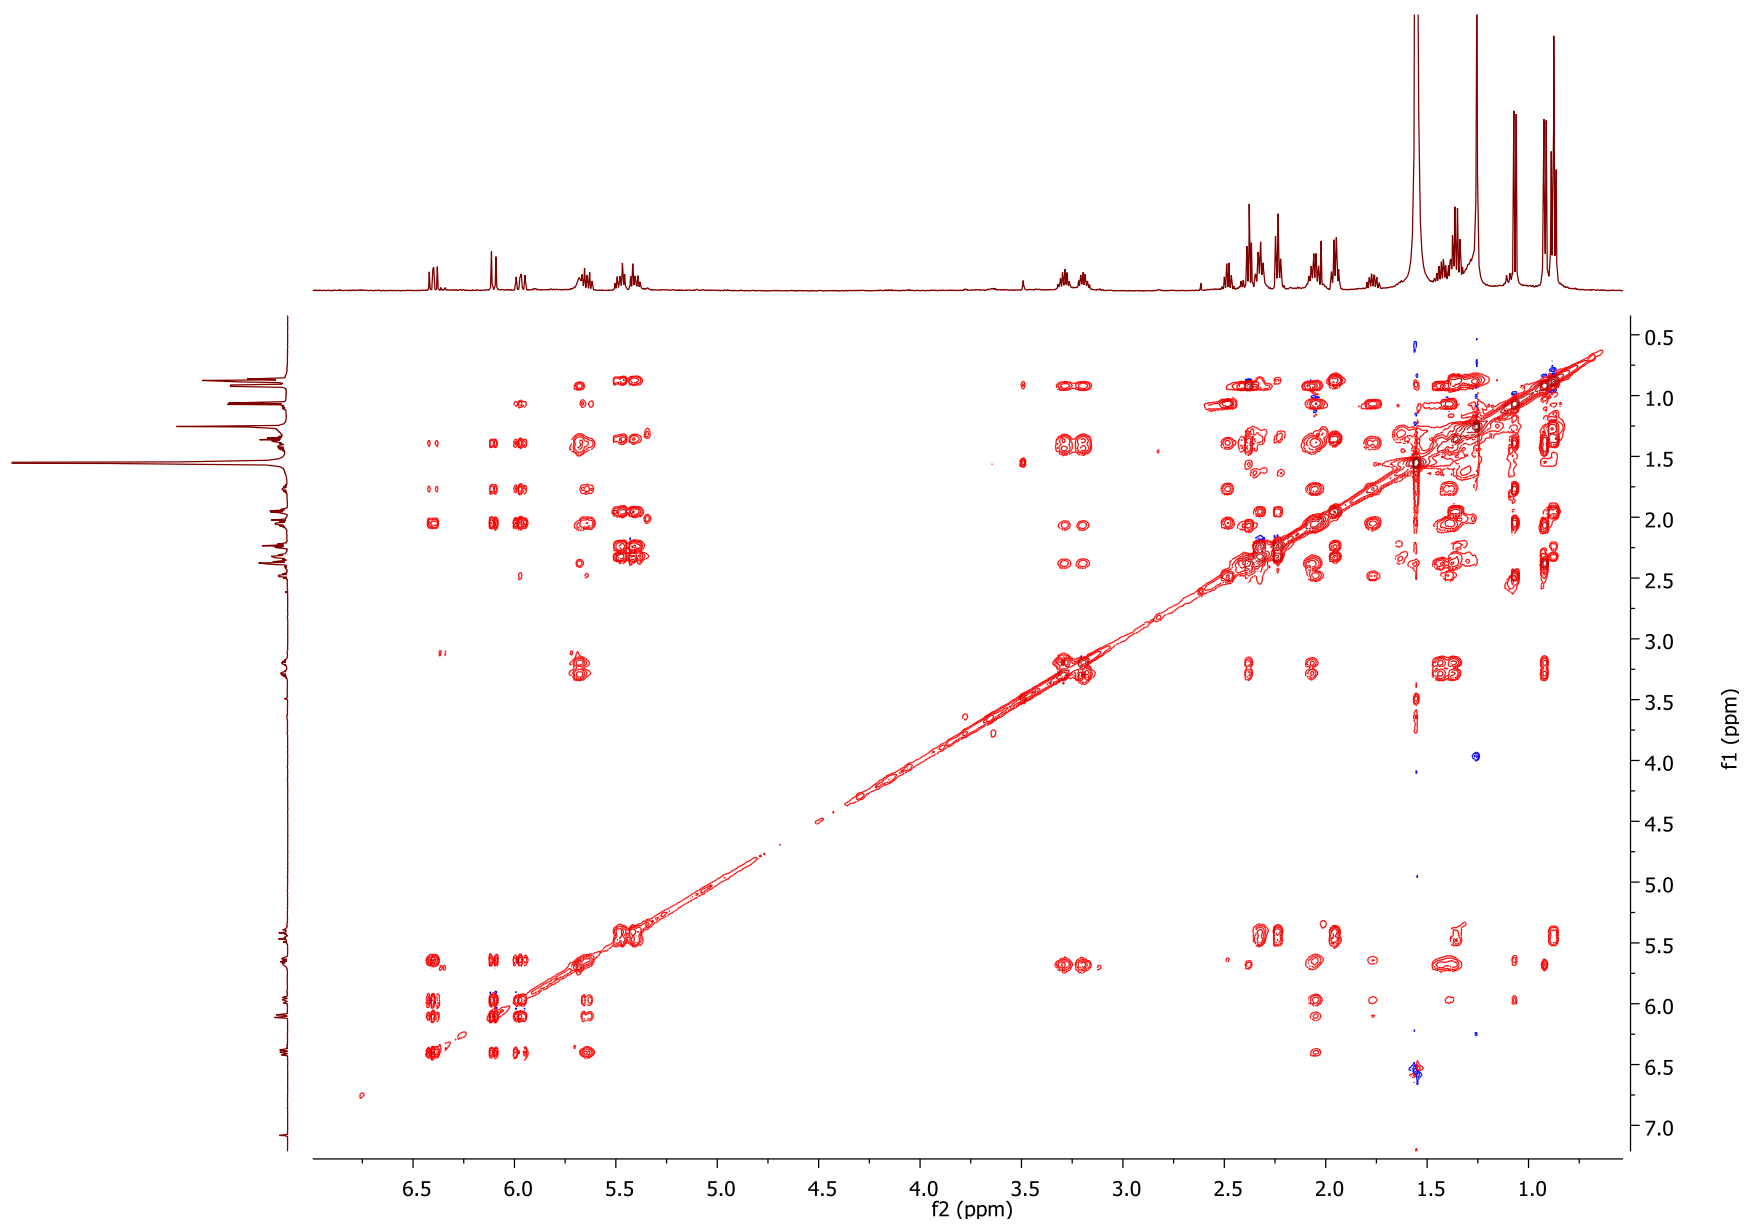

**Fig. S13** TOCSY spectrum of pitamide A in  $\text{CDCl}_3$  (600 MHz).

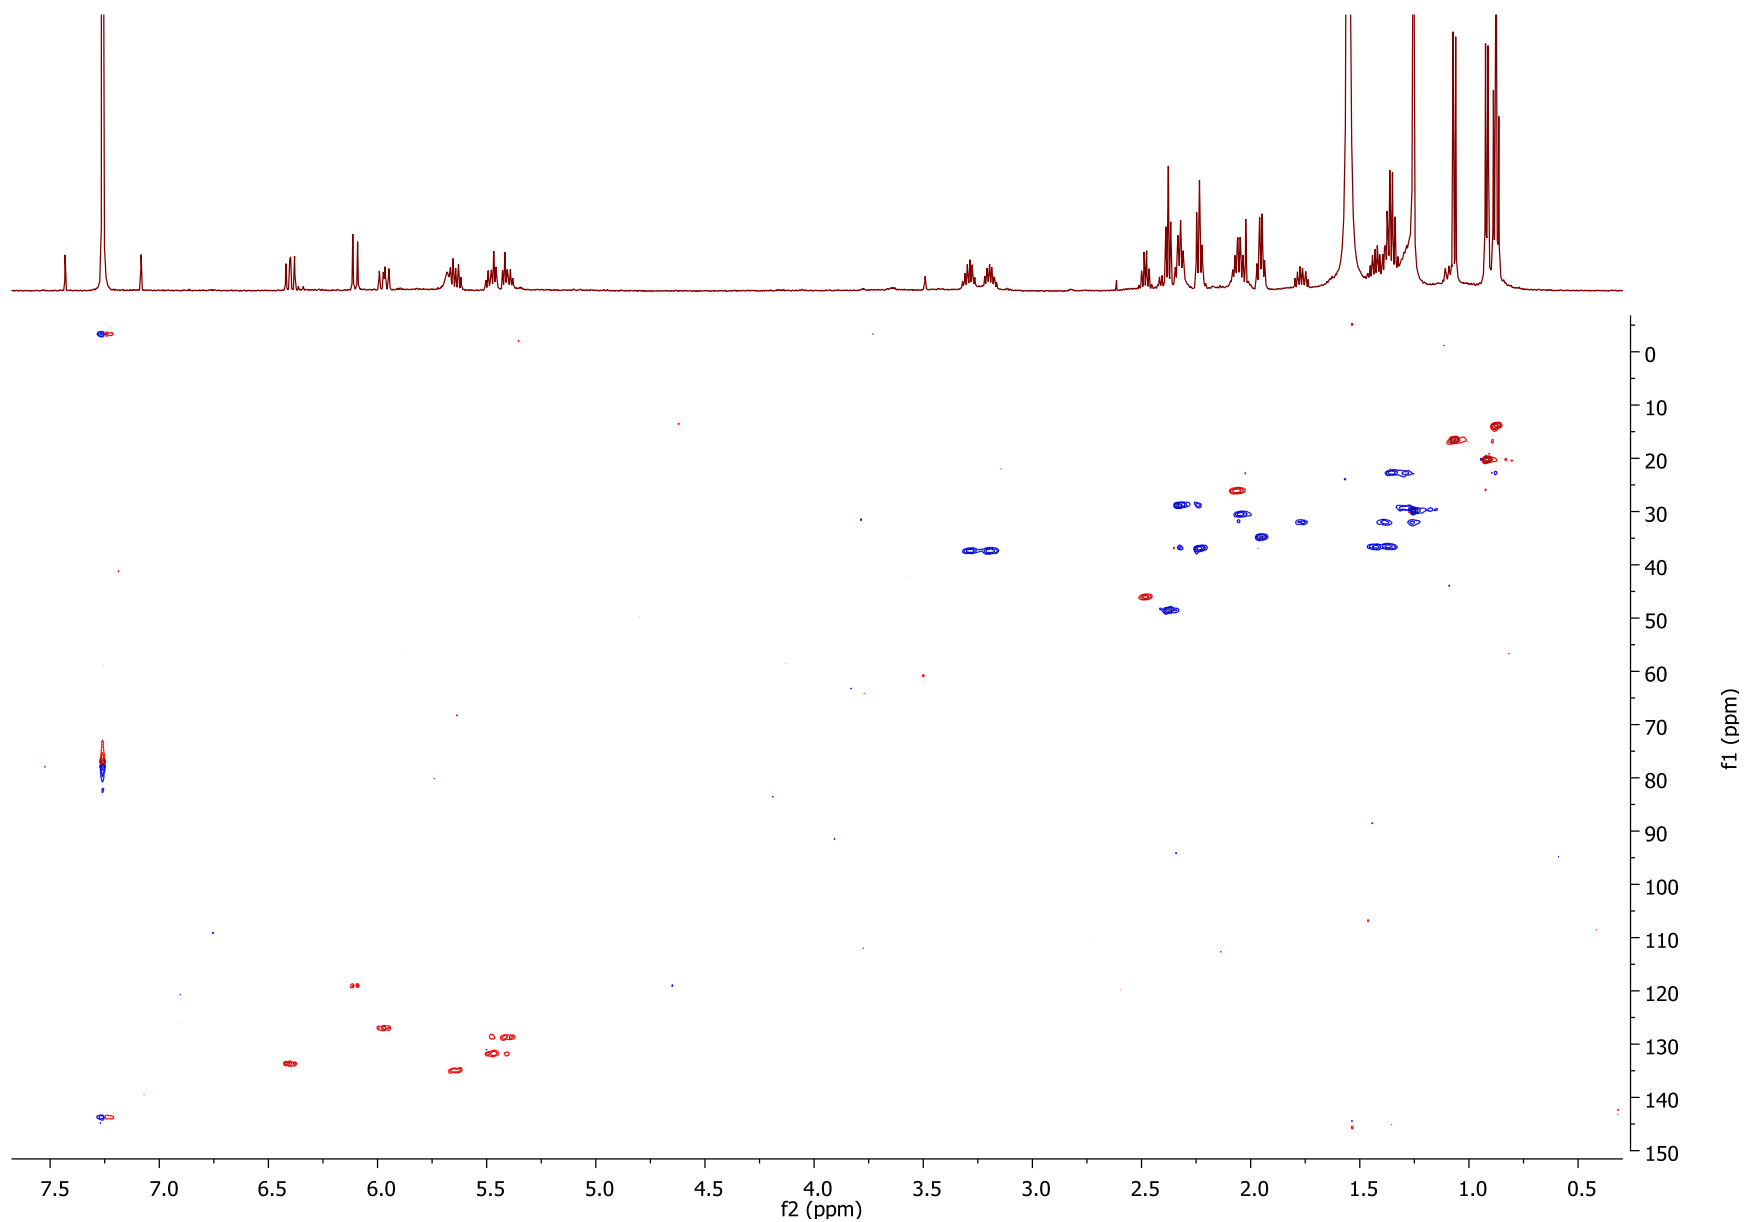

**Fig. S14** HSQC spectrum of pitamide A in CDCl<sub>3</sub> (600 MHz).



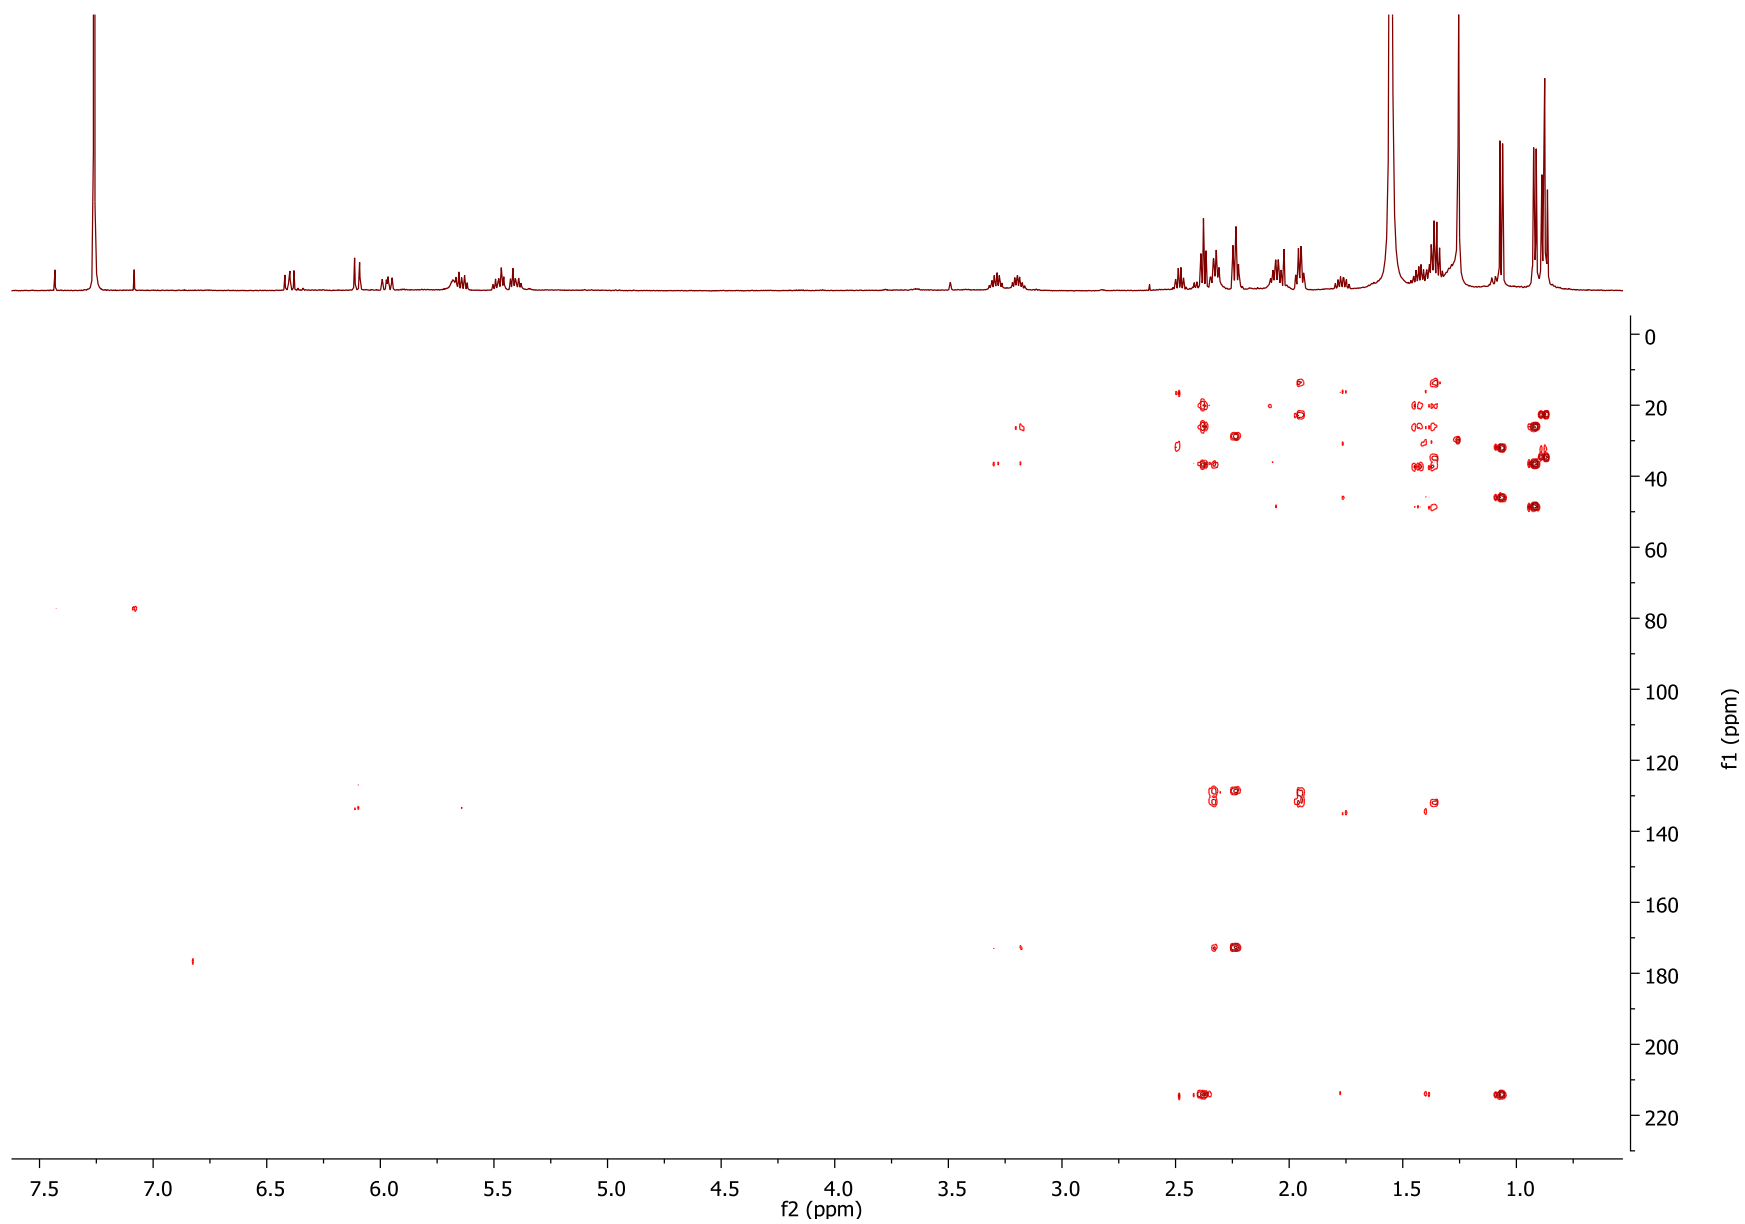

**Fig. S15** HMBC spectrum of pitiamide A in  $\text{CDCl}_3$  (600 MHz).

**Table S1** Reported optical activity of model compounds with  $\alpha$ -ketone stereocenter and similar structure scaffold.

| Number | Structure                                                                         | Specific Optical Rotation                                            | Reference |
|--------|-----------------------------------------------------------------------------------|----------------------------------------------------------------------|-----------|
| 1      | 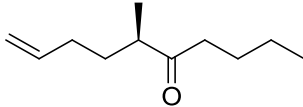 | $[\alpha]_{\text{D}}^{23} -17.9^{\circ}$ (c 1.0, CHCl <sub>3</sub> ) | 1         |
| 2      |  | $[\alpha]_{\text{D}}^{23} +19.6^{\circ}$ (c 1.9, CHCl <sub>3</sub> ) | 2         |

1 *Young AJ, White MC.* Allylic C-H Alkylation of Unactivated  $\alpha$ -Olefins: Serial Ligand Catalysis Resumed. *Angew Chem Int Edit* 2011; 50: 6824-6827.

2 *Ghosh AK, Gong G.* Total synthesis and revision of C6 stereochemistry of (+)-amphidinolide W. *J Org Chem* 2006; 71: 1085-1093.
